# Supplementary material
Source: PubMed Central journal article supplement (PMC4487517)

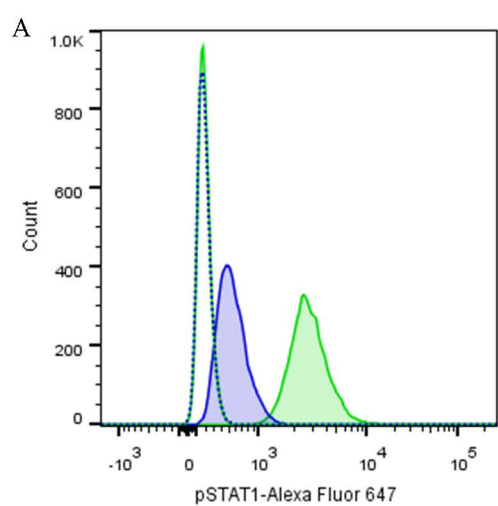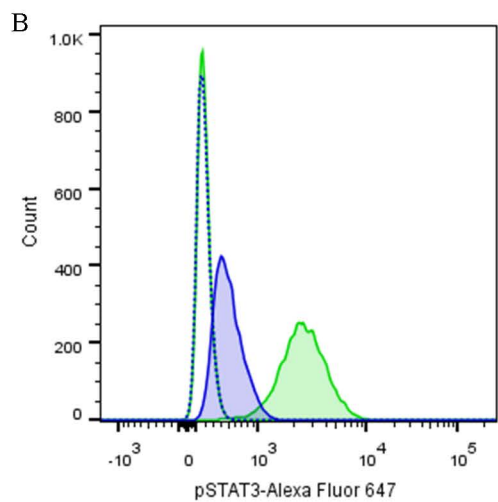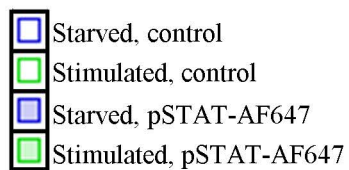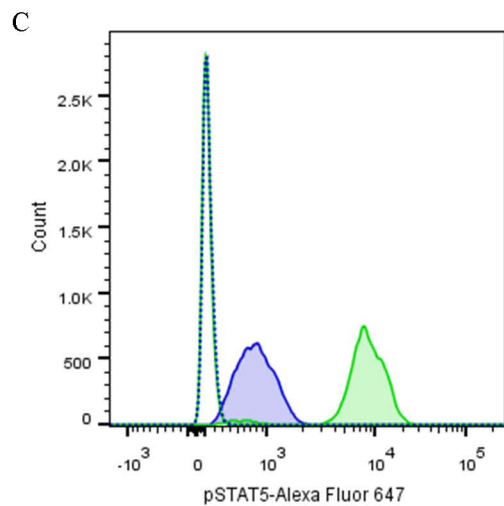

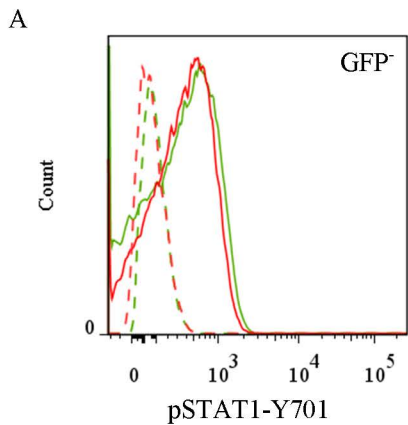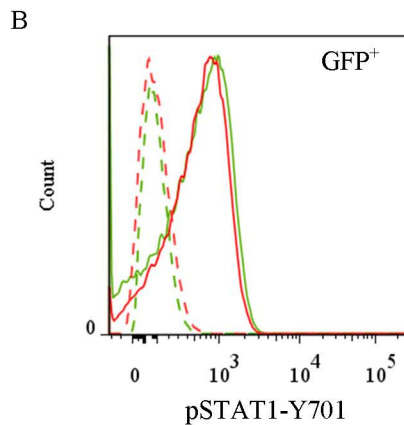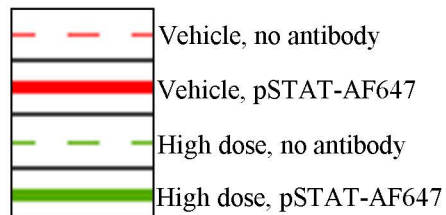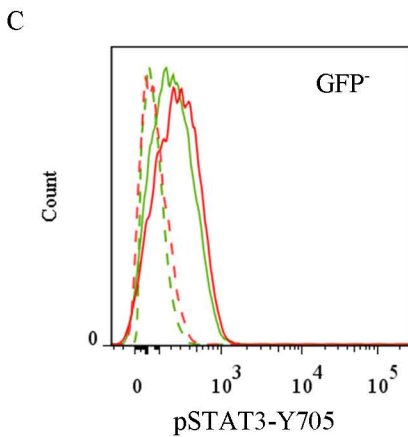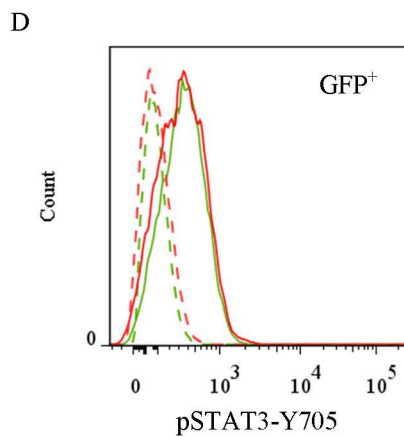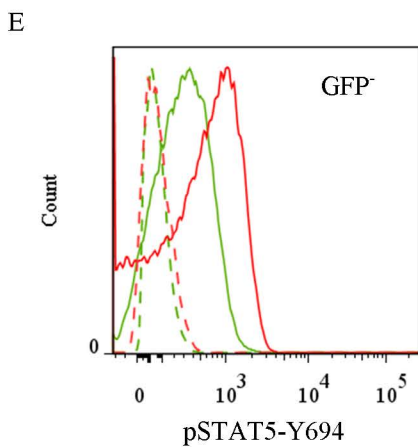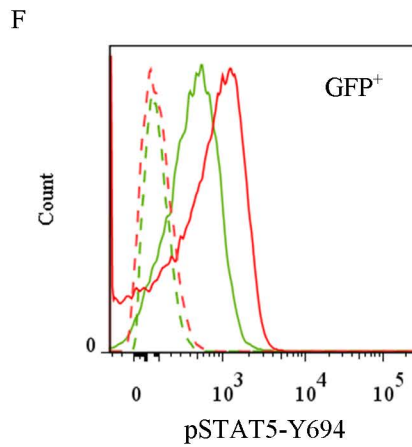

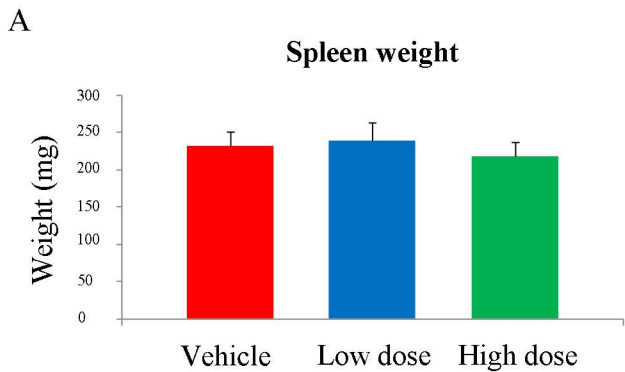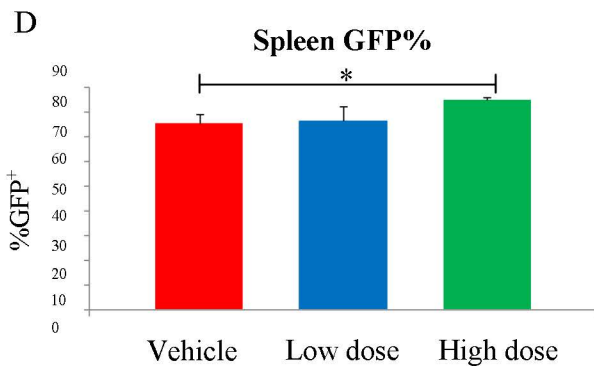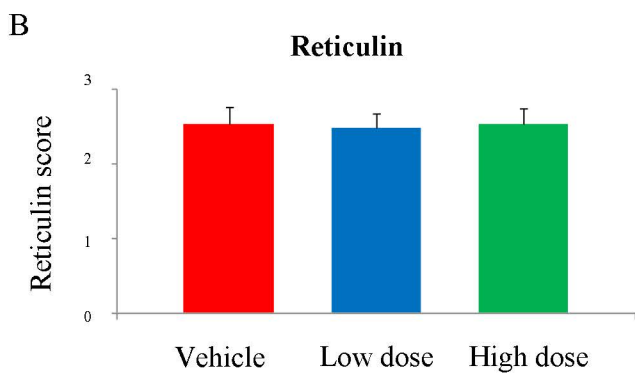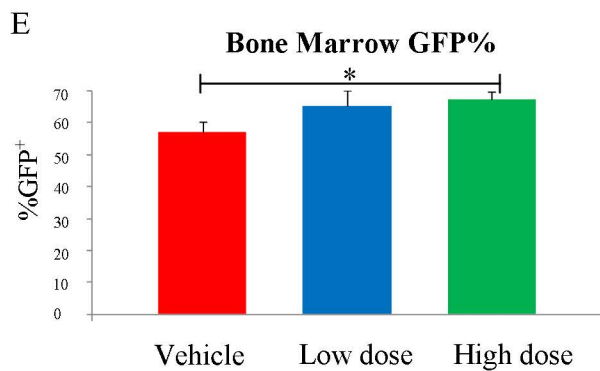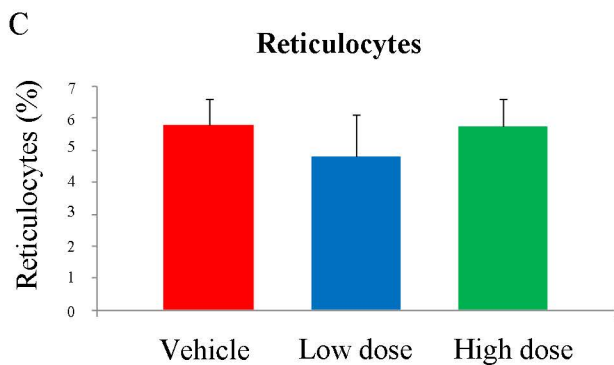

A

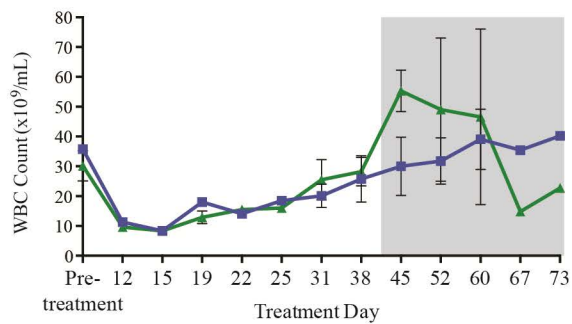

B

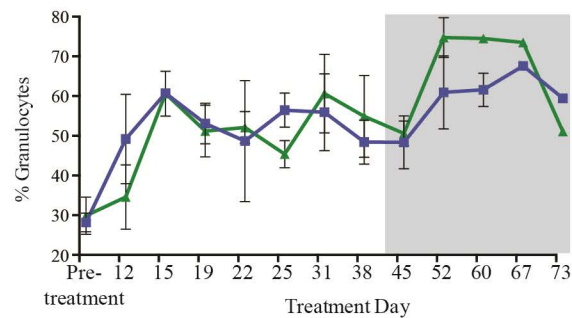

C

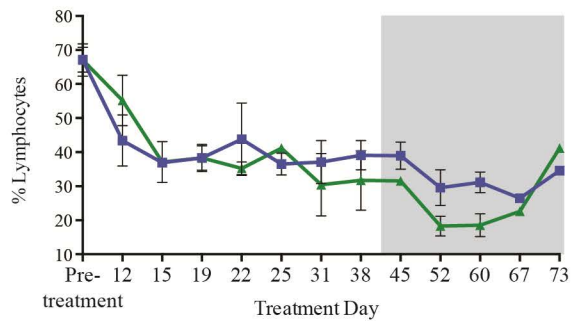

D

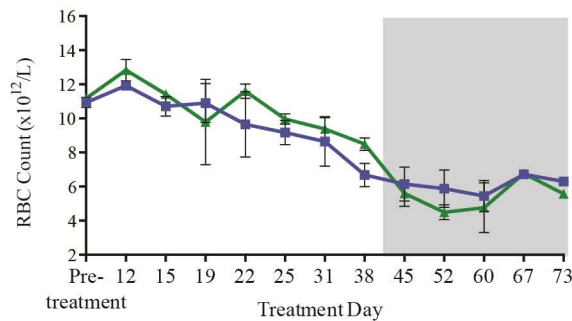

E

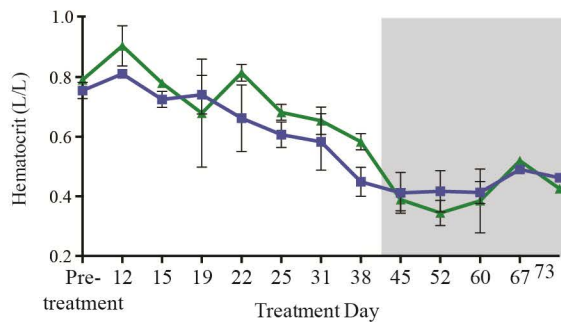

F

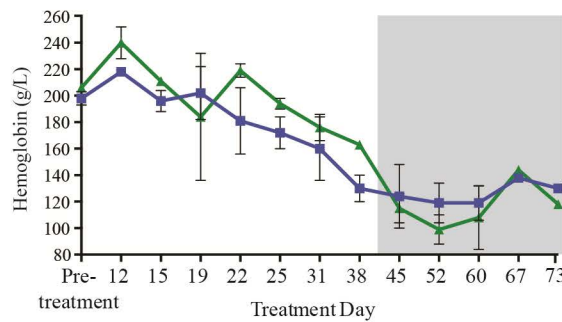

G

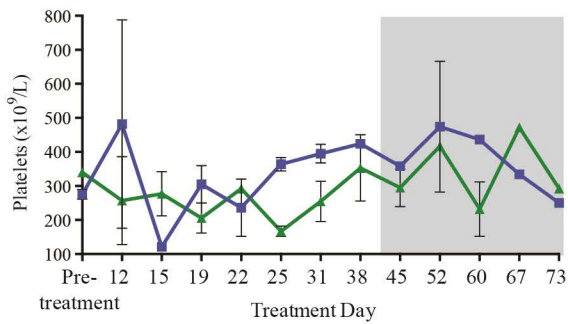

H

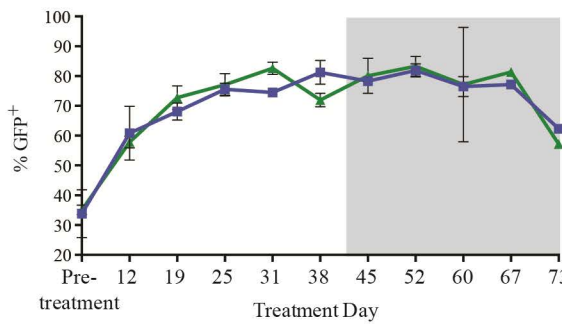

Vehicle

High dose

A

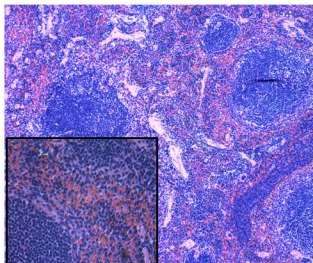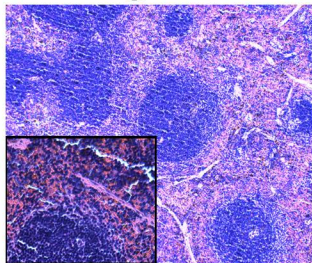

Spleen

B

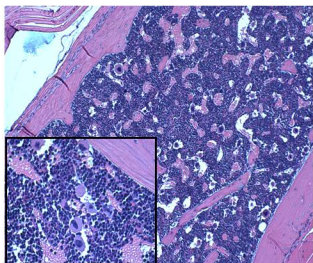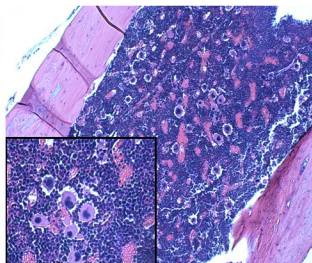

Bone marrow

C

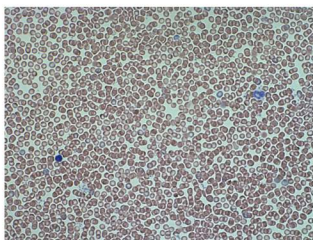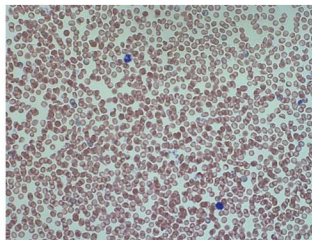

Peripheral blood

### Impact of BMS-911543 on white blood cell count

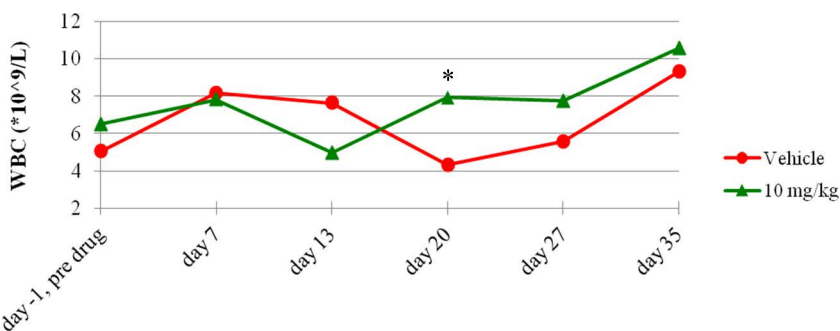

### Impact of BMS-911543 on red blood cell count

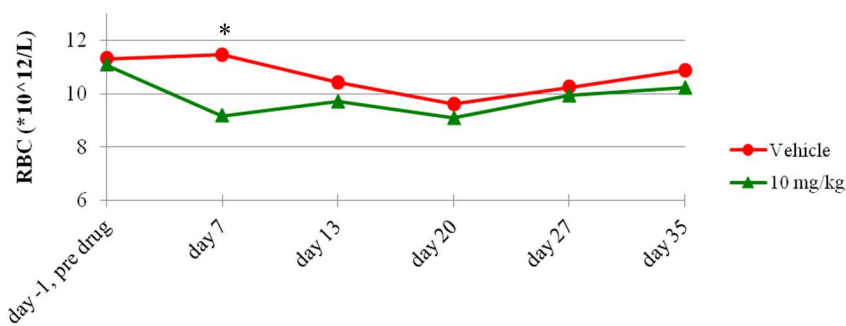

### Impact of BMS-911543 on hematocrit

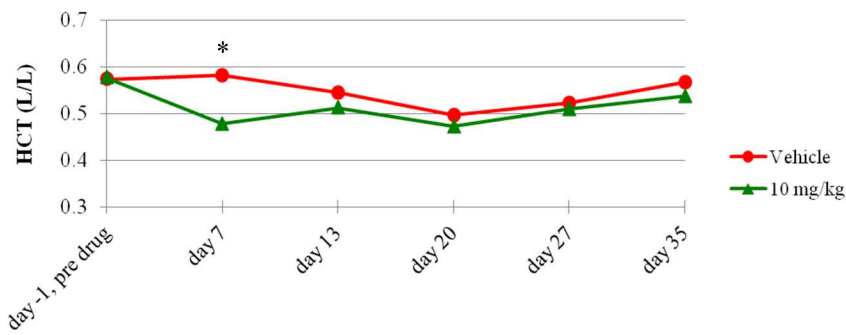

### Impact of BMS-911543 on hemoglobin

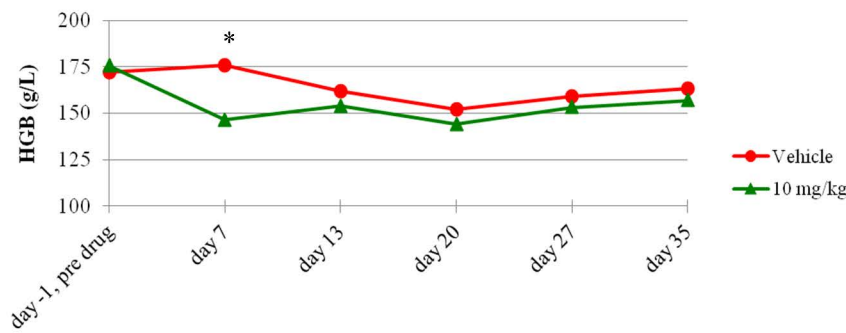

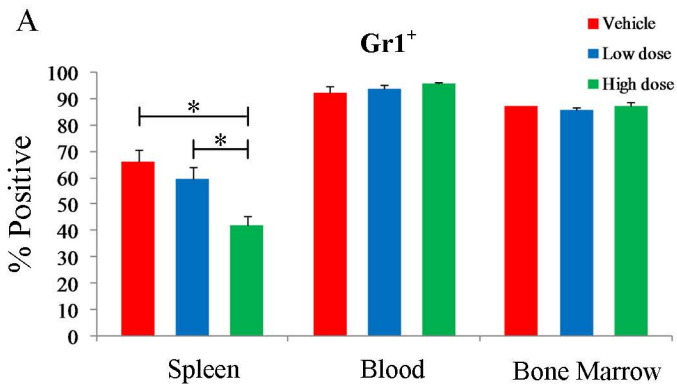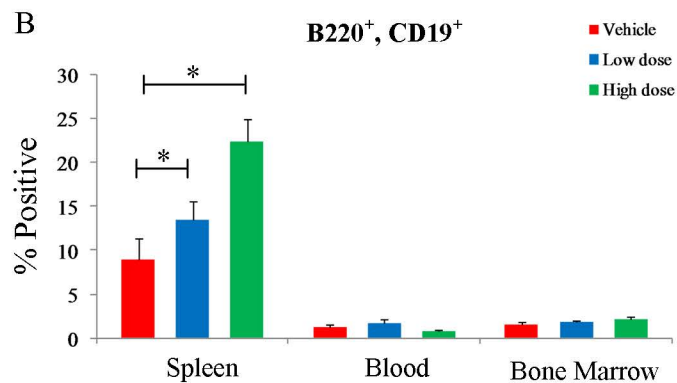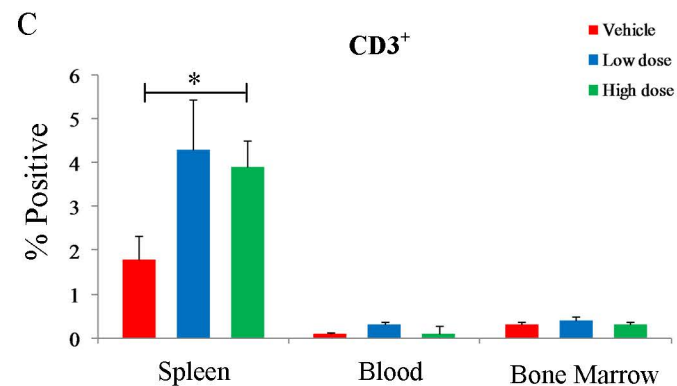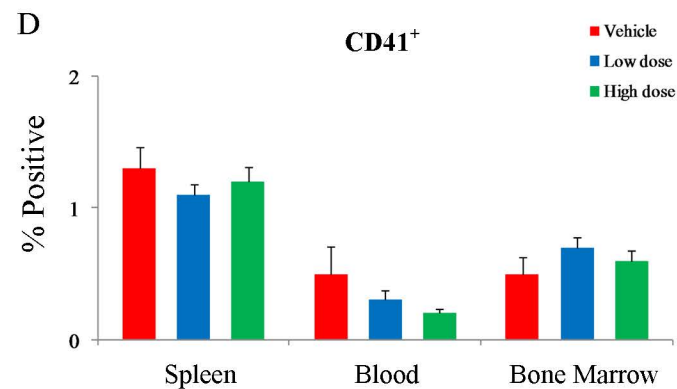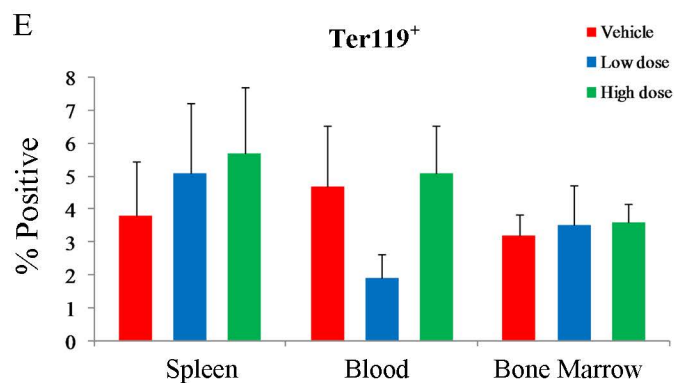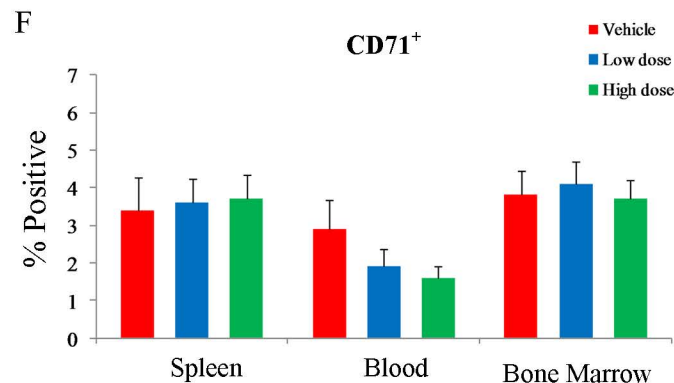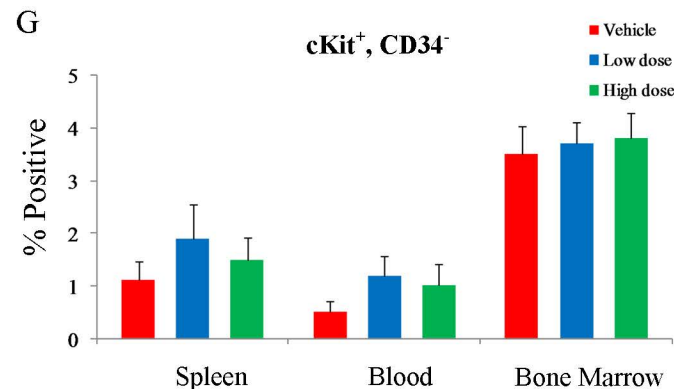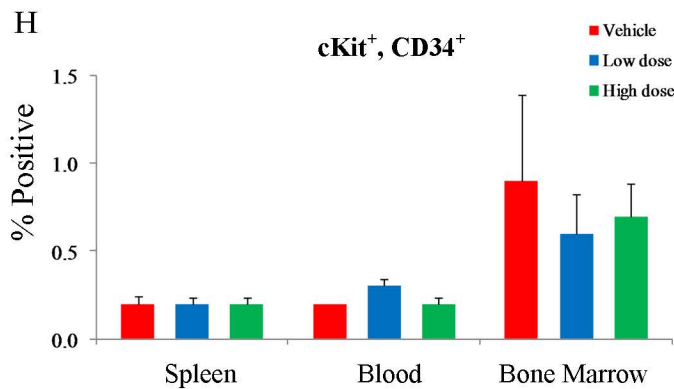



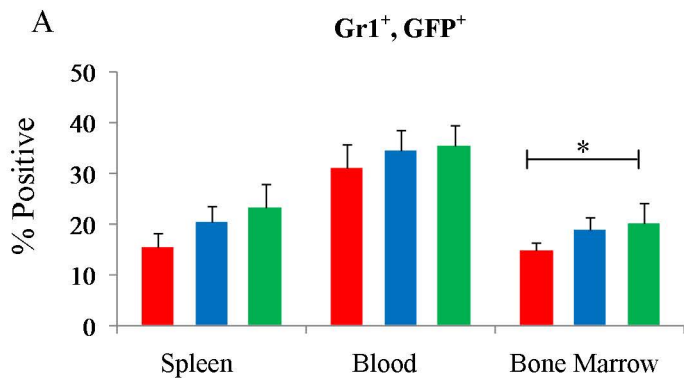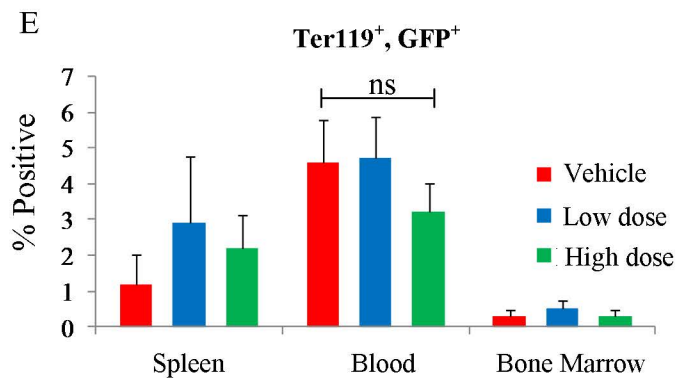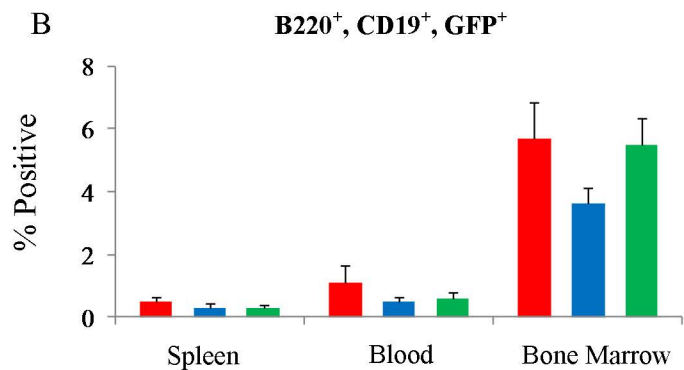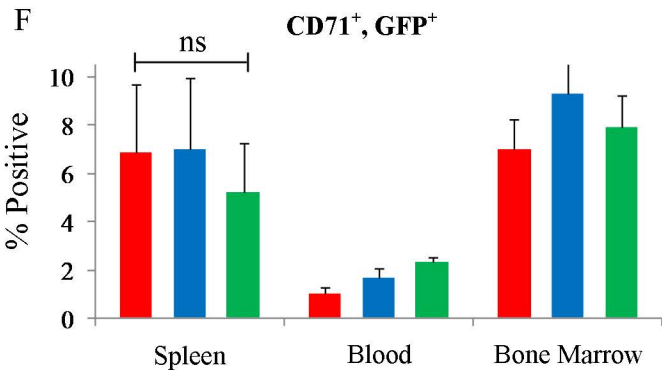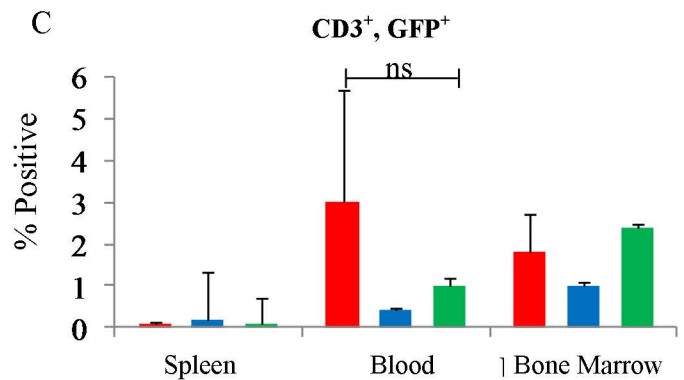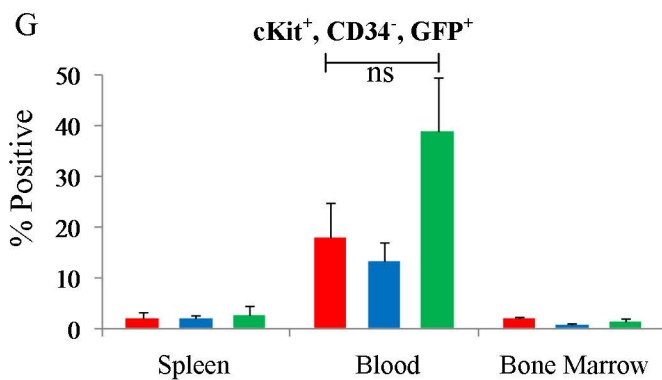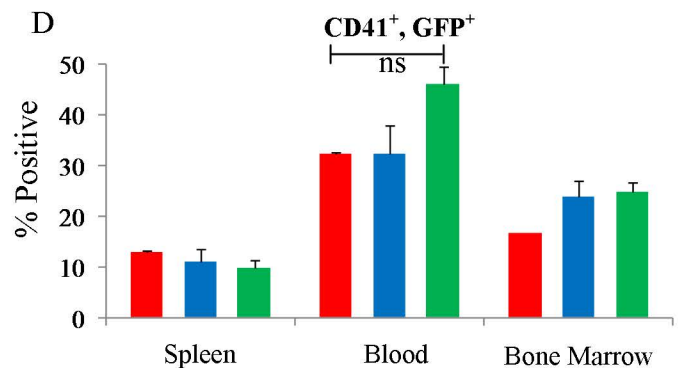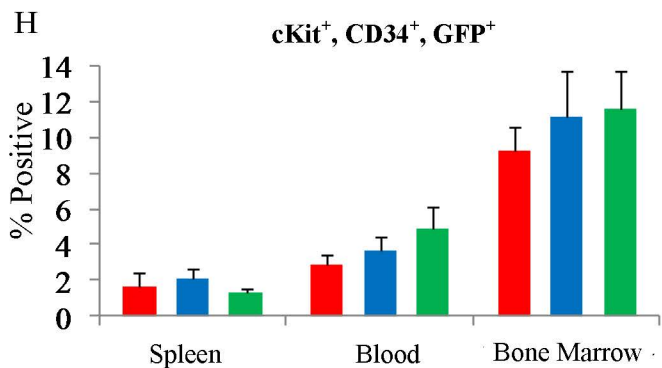

A

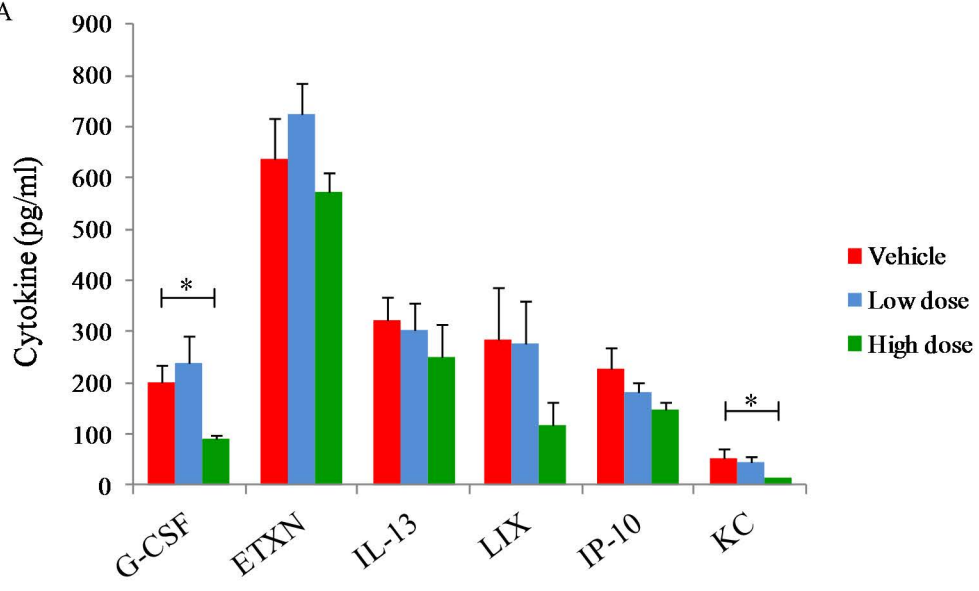

B

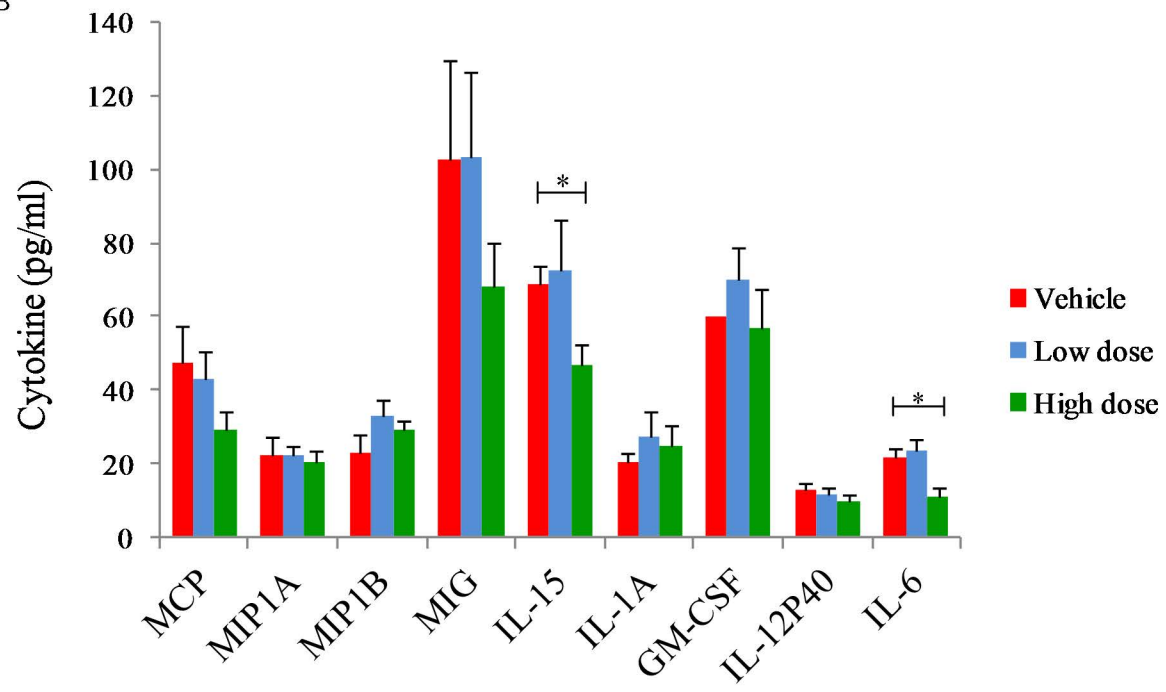

C

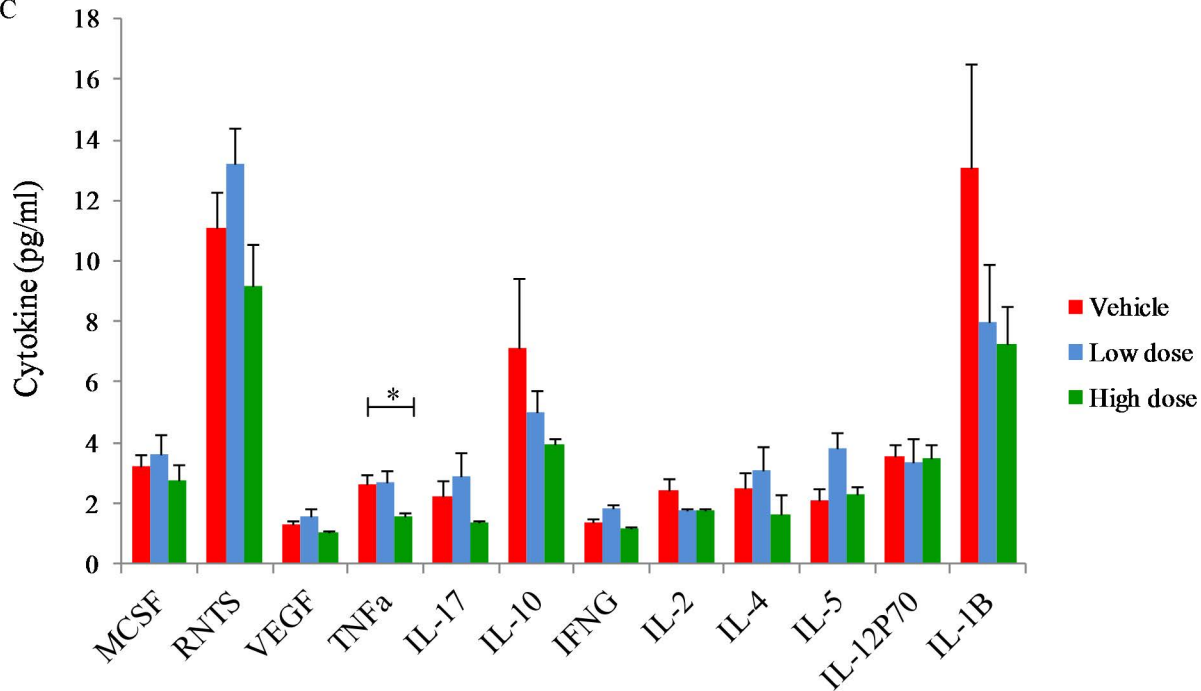

A

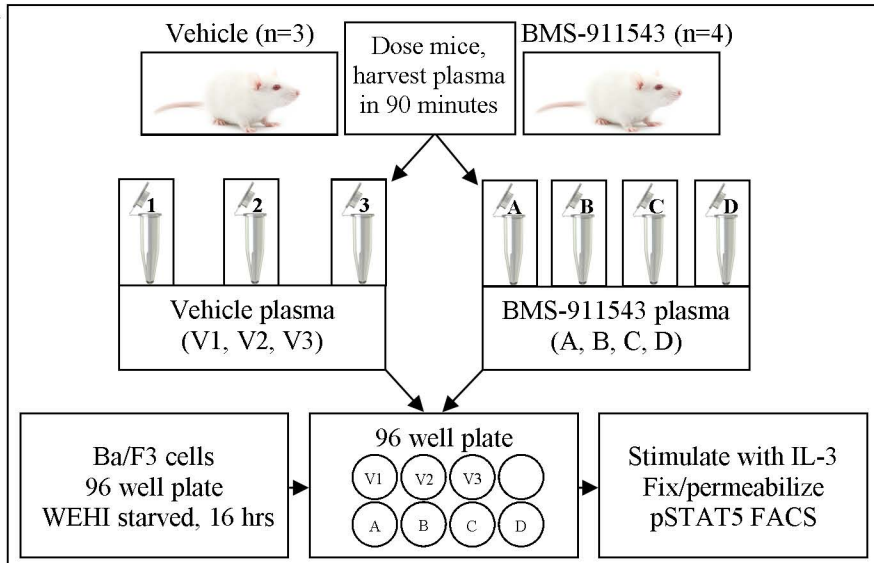

B

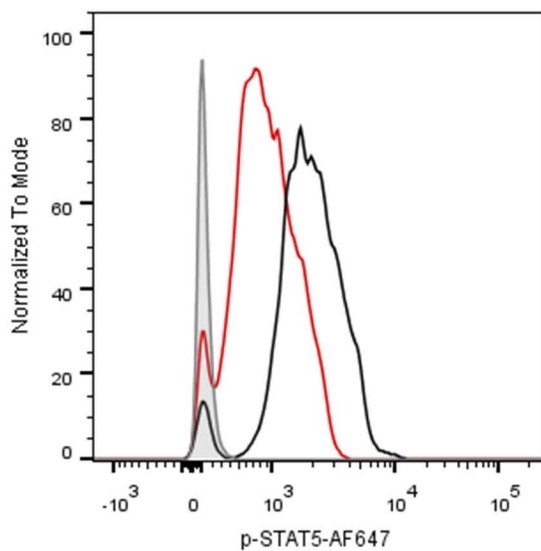

|   | IL-3 induced? | Mouse Plasma | MFI  |
|---|---------------|--------------|------|
| ■ | No            | None         | 105  |
| □ | Yes           | Vehicle      | 2060 |
| ▢ | Yes           | BMS-911543   | 905  |

C

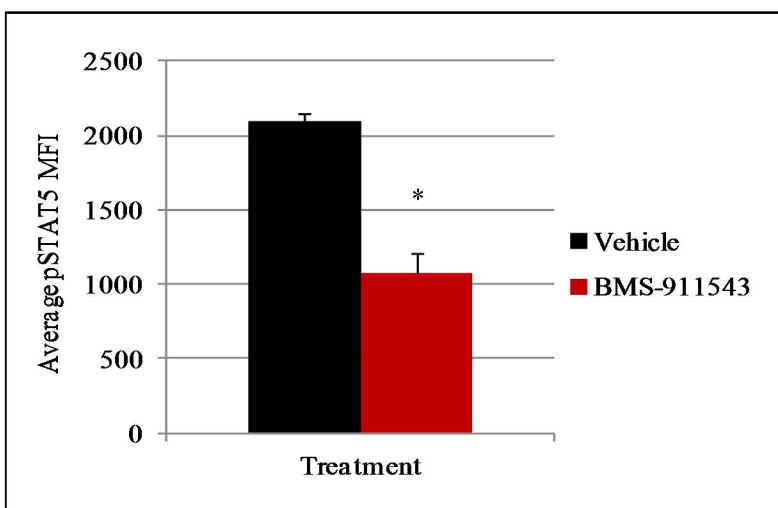

Supplement: NIHMS684305-supplement-supplement_1.pdf [file NIHMS684305-supplement-supplement_1.pdf]
